# Supplementary material for: Targeting the methyltransferase SETD8 impairs tumor cell survival and overcomes drug resistance independently of p53 status in multiple myeloma
Source: PubMed Central journal article supplement (PMC8447659; doi:10.1186/s13148-021-01160-z), 2021-09-16

# Supplementary Figure S1

**A**

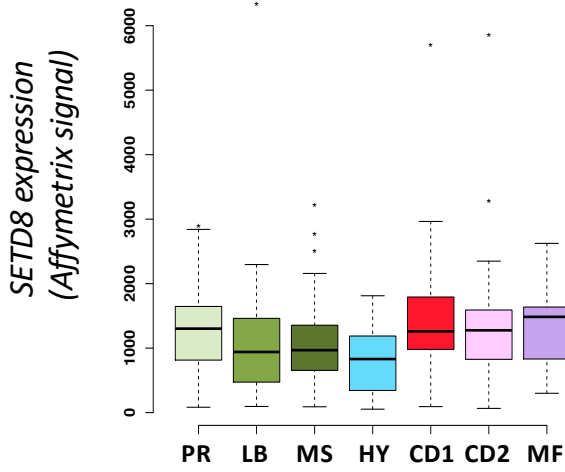

**B**

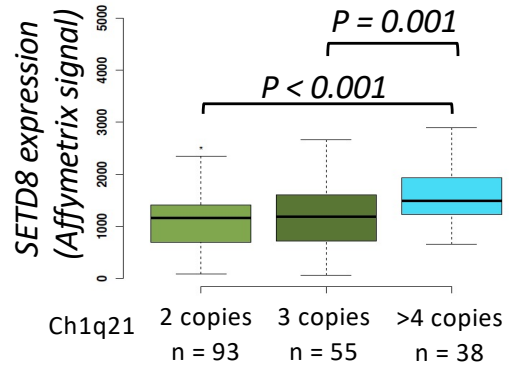

**C**

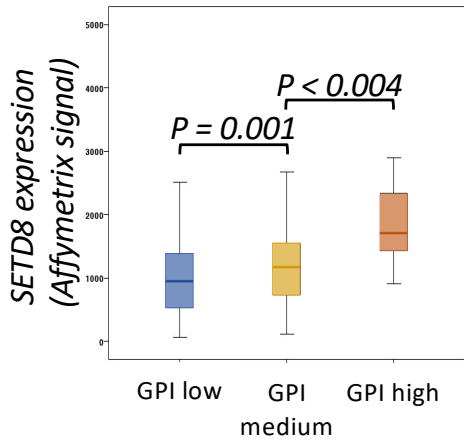

**D**

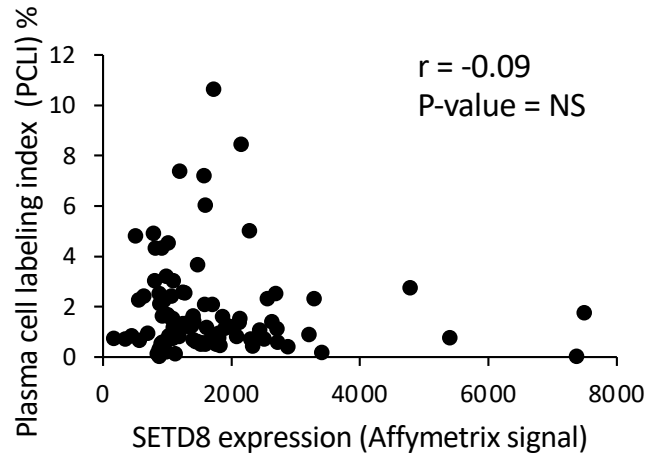

# Supplementary Figure S2

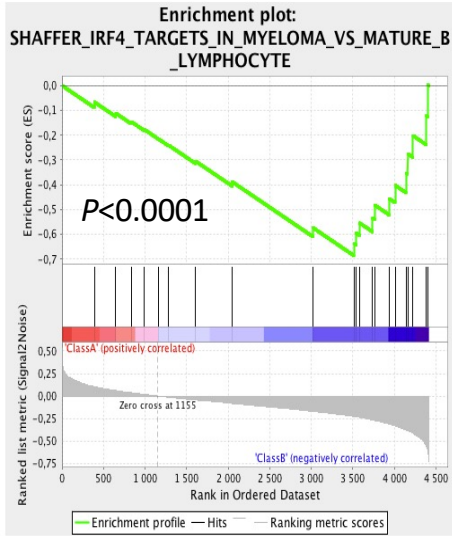

Normalized enrichment score = -2.02

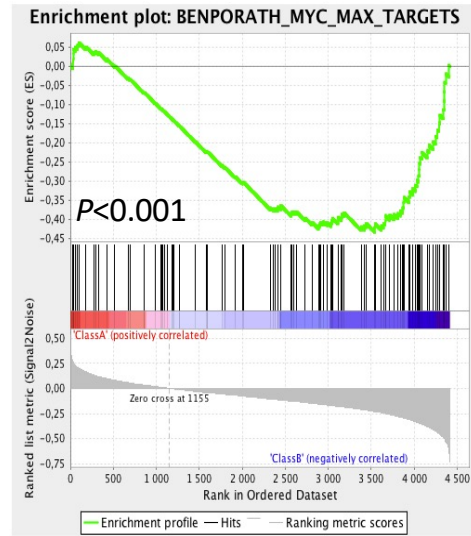

Normalized enrichment score = -1.83

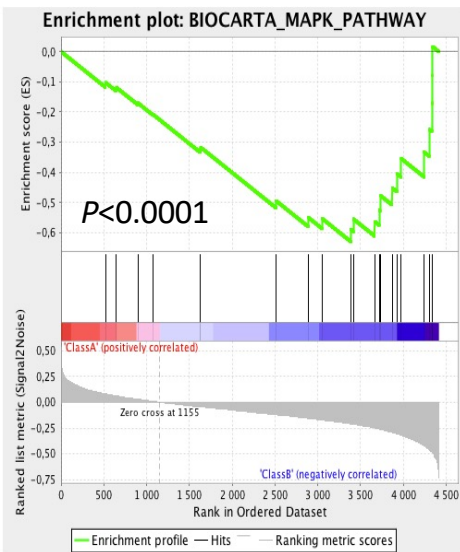

Normalized enrichment score = -1.89

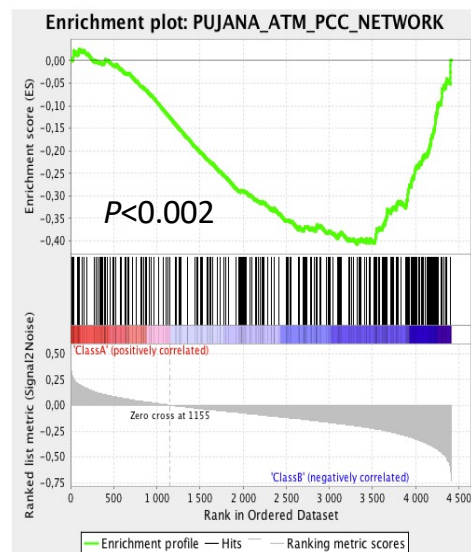

Normalized enrichment score = -1.82

# Supplementary Figure S3

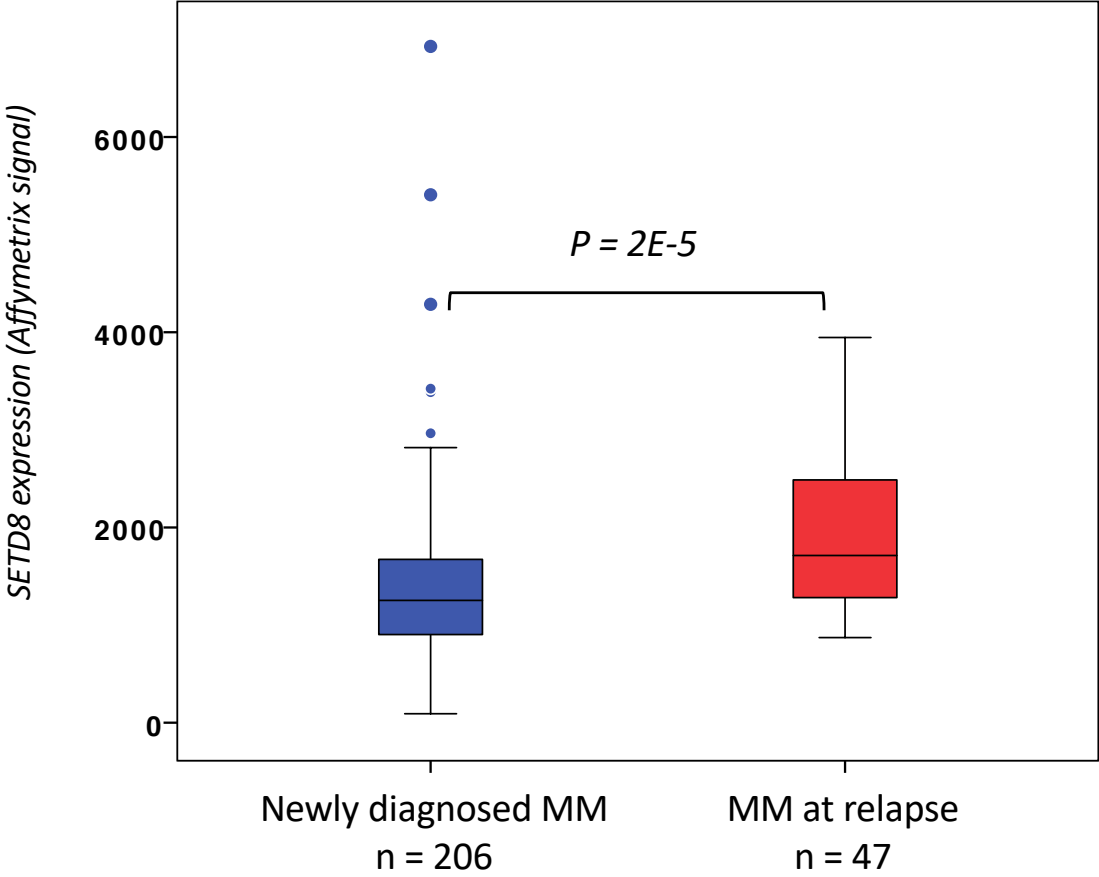

# Supplementary Figure S4

**A**

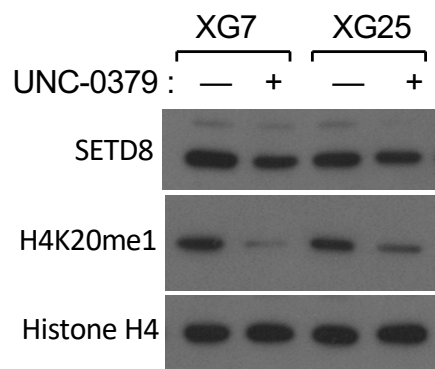

**B**

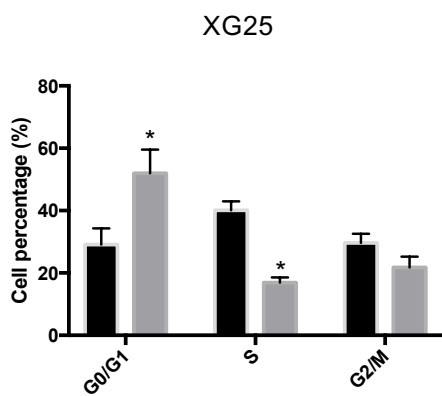

**C**

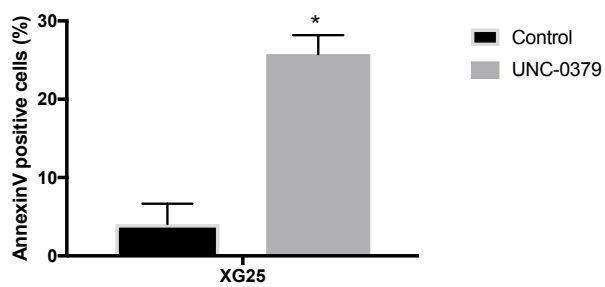

## Supplementary Figure S5

A

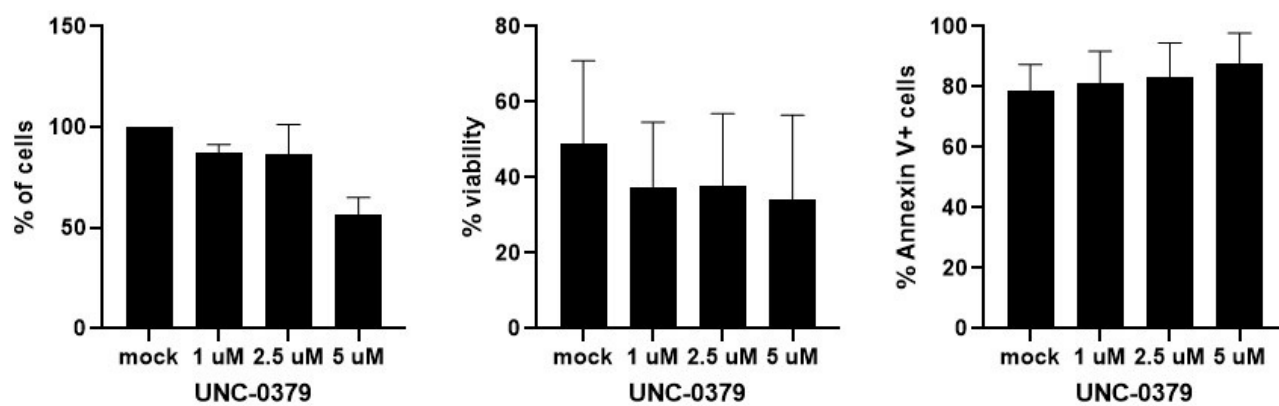

B

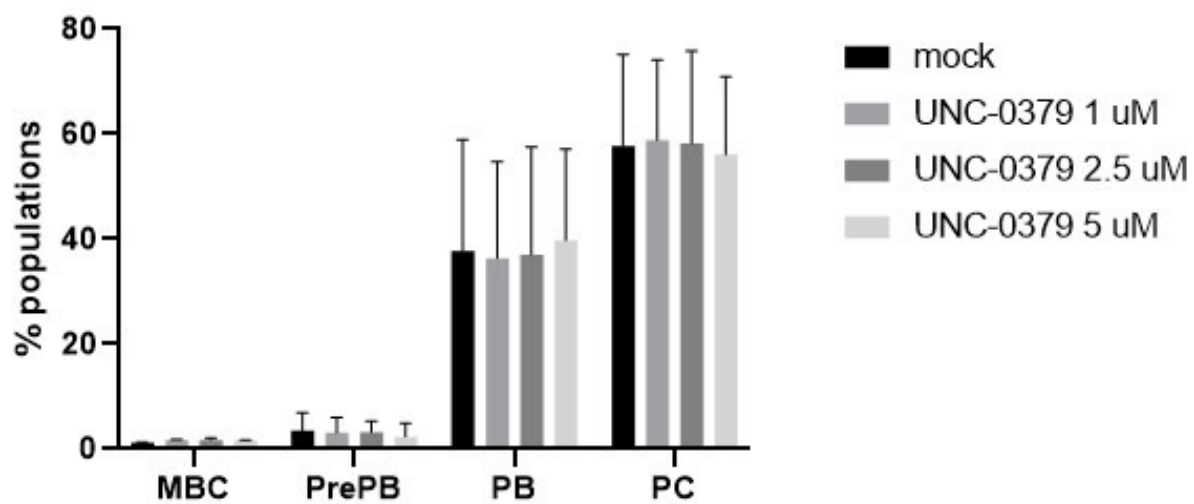

## Supplementary Figure S6

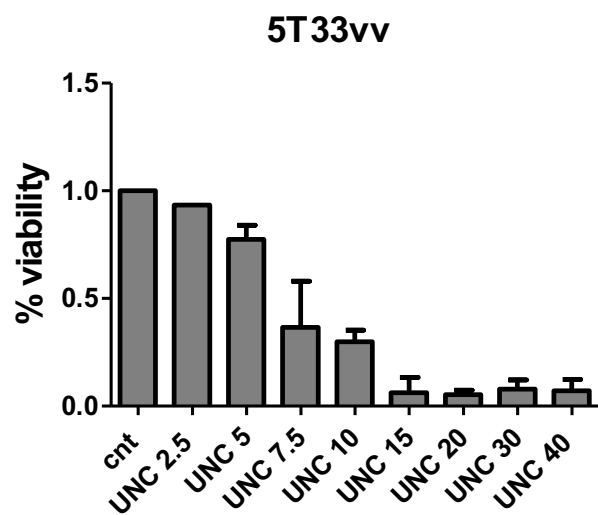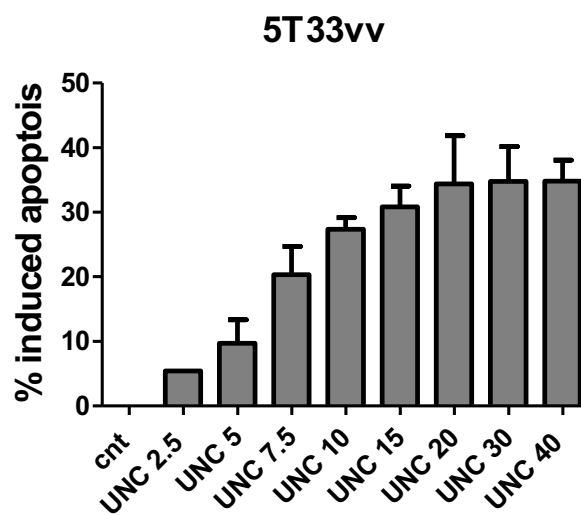

# Supplementary Figure S7

**A**

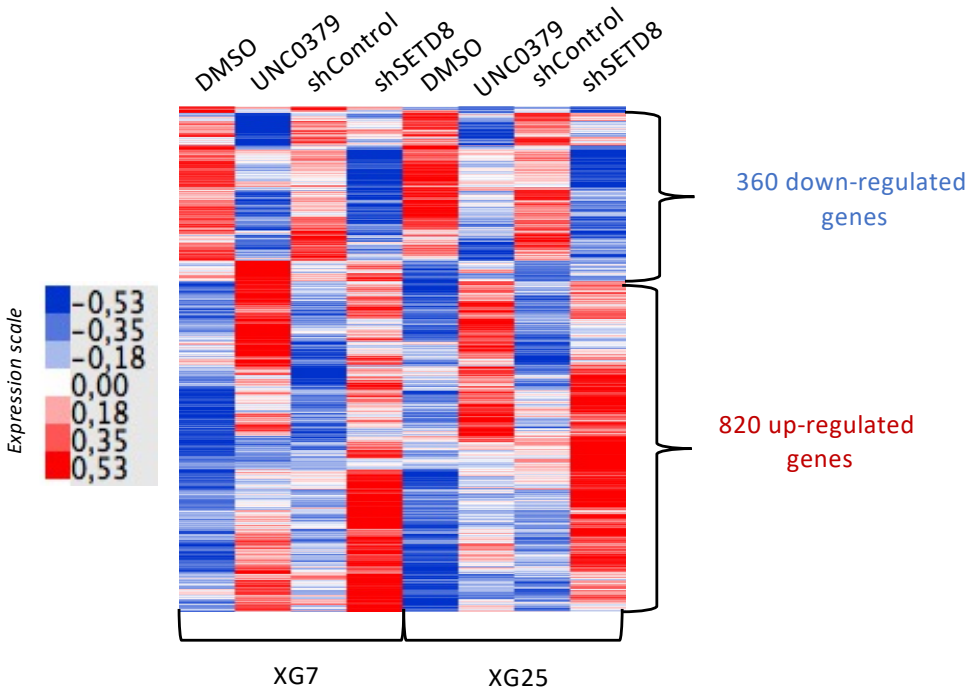

**B**

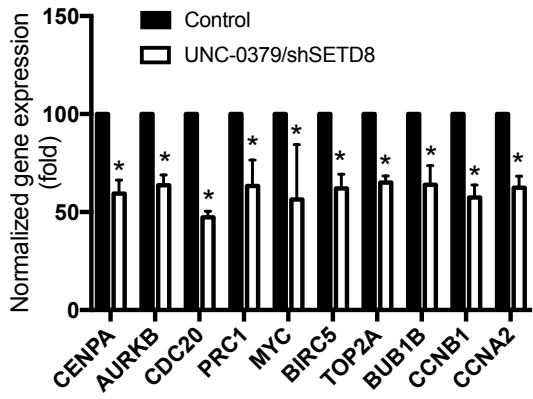

**C**

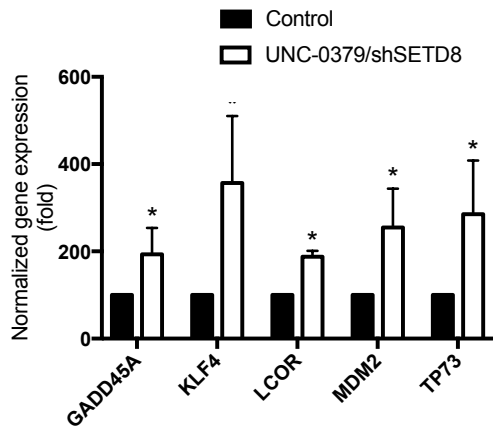

# Supplementary Figure S8

**A**

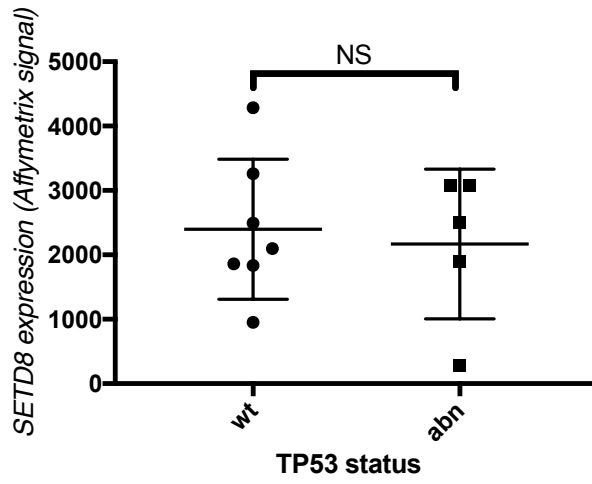

**B**

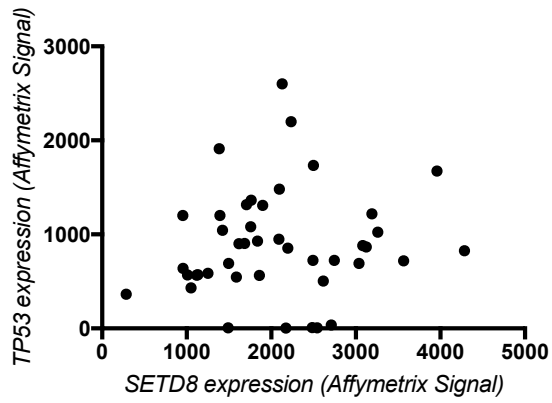



# Supplementary Figure S9

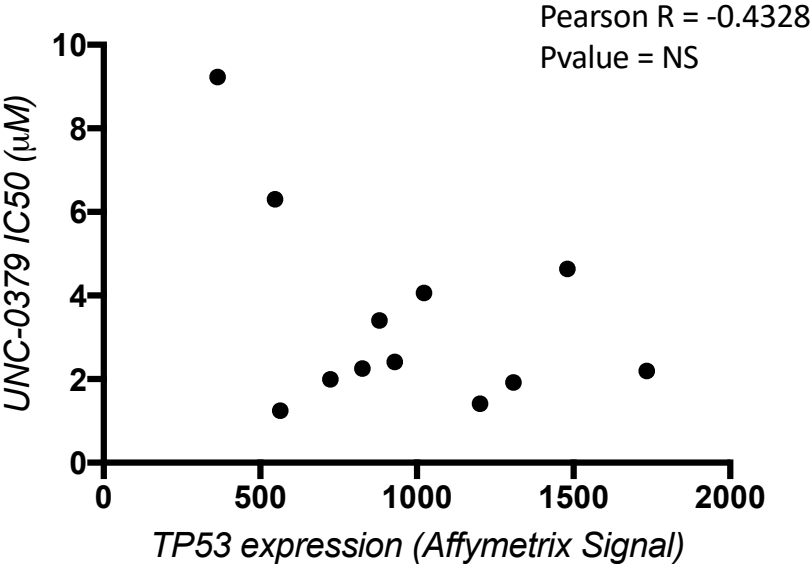

# Supplementary Figure S10

**A**

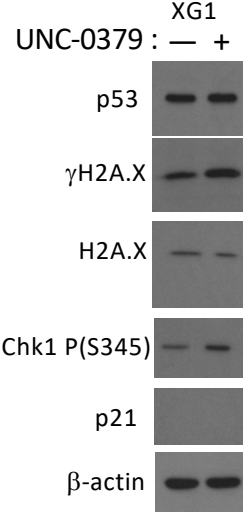

**B**

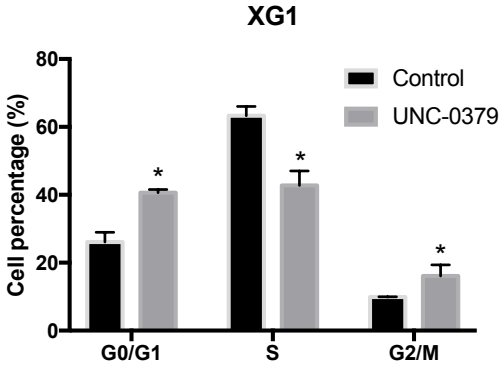

**C**

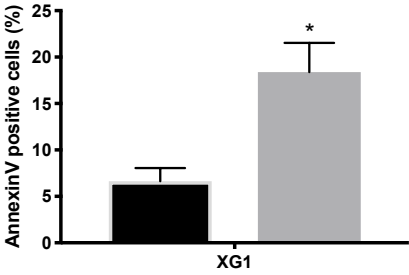

# Supplementary Figure S11

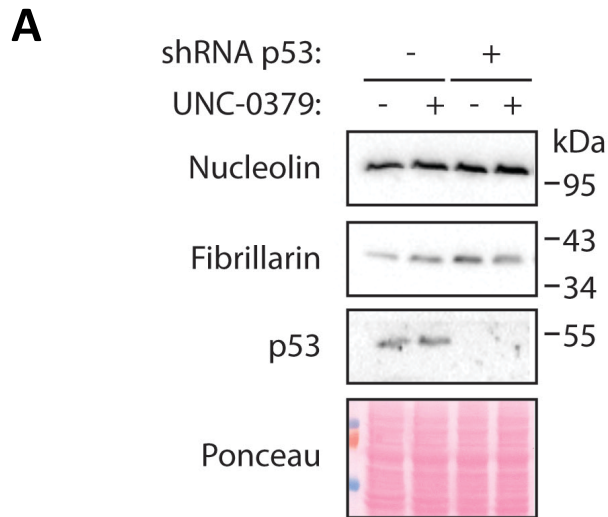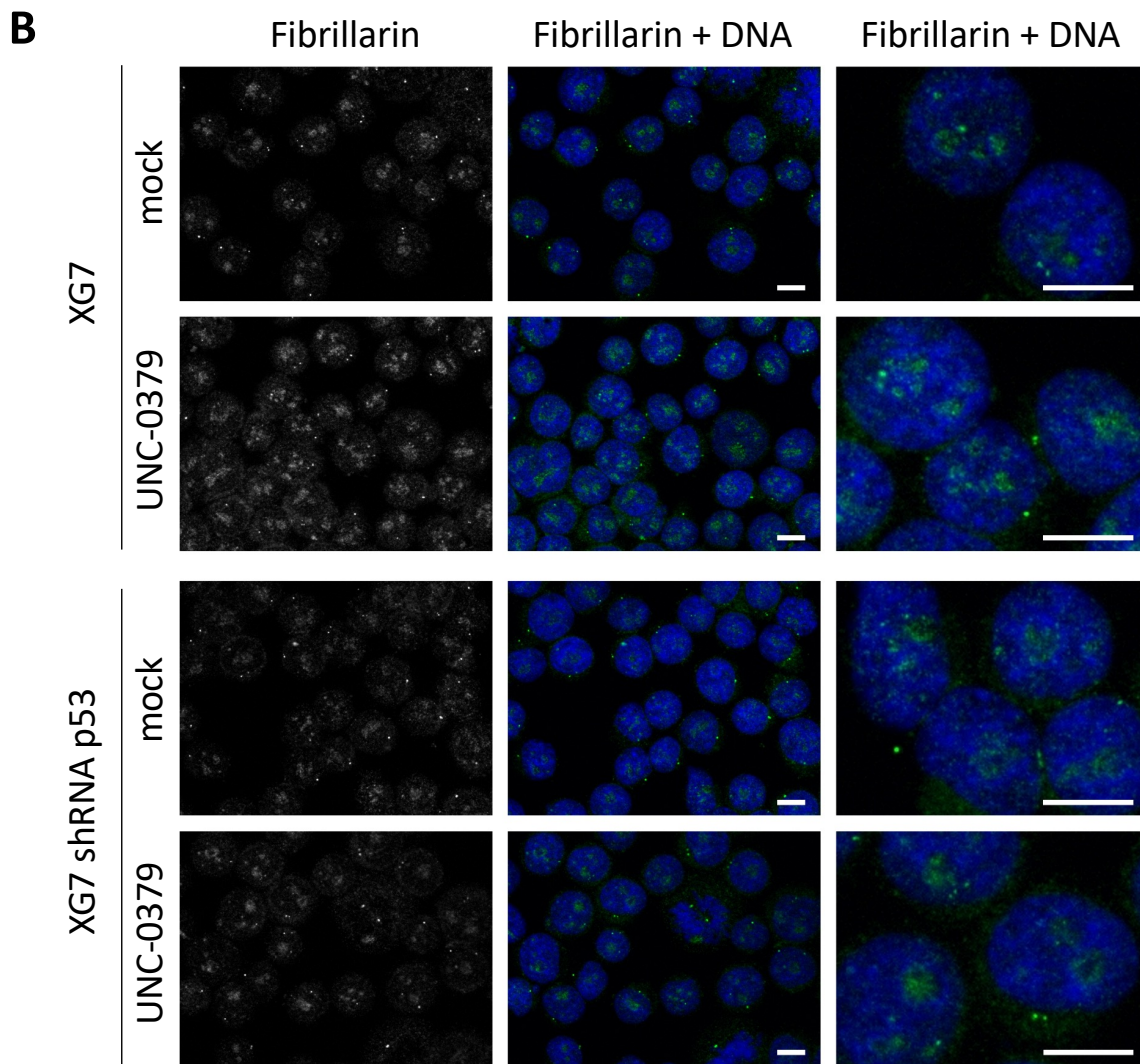

# Supplementary Figure S12

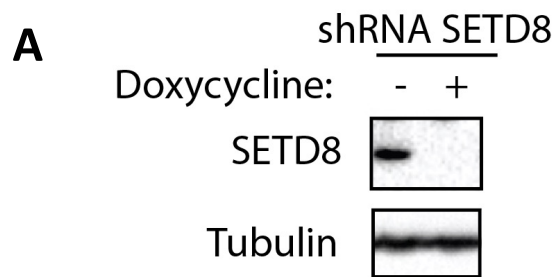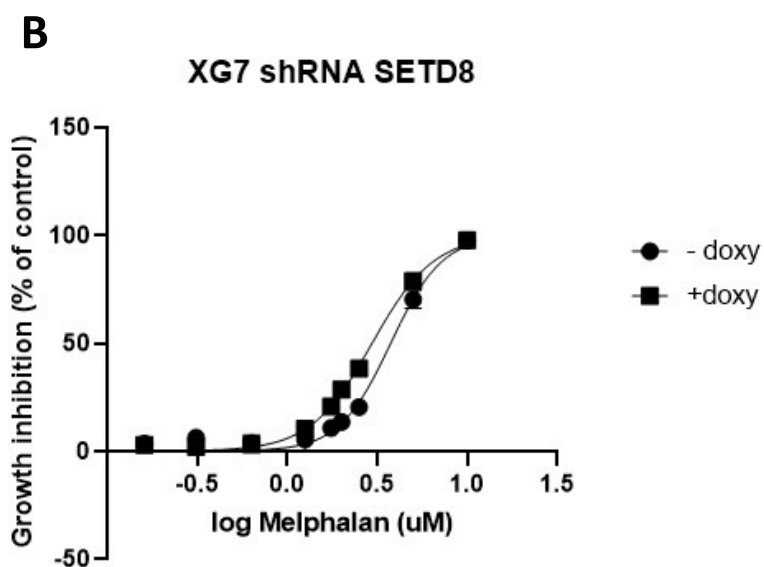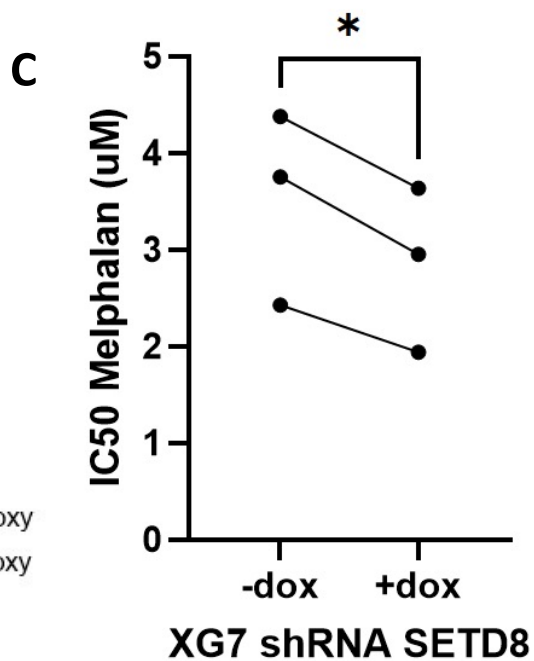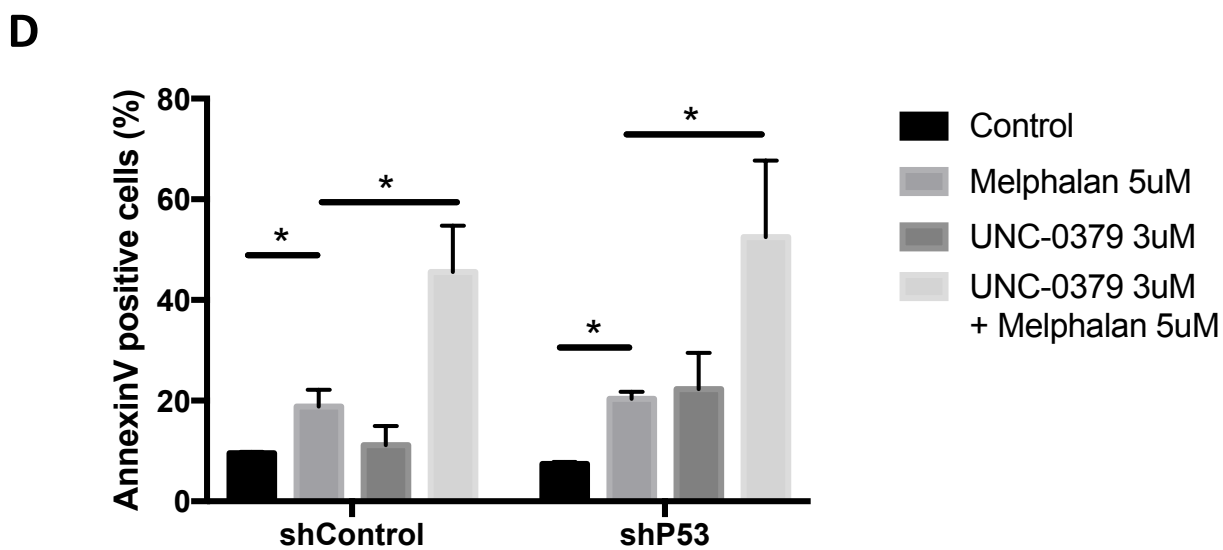

# Supplementary Figure S13

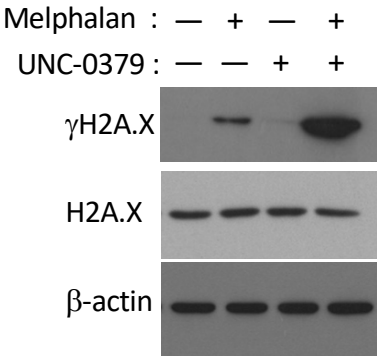

Supplement: 13148_2021_1160_MOESM3_ESM.pdf [file 13148_2021_1160_MOESM3_ESM.pdf]
